# Supplementary material
Source: MDPI journal article supplement (https://www.mdpi.com/2073-4441/16/3/480)
Supplement: s1 [file s1 › water-2833849-supplementary.pdf]

**Figure S1.** Correlation graph of physico-chemical properties of water and allantoin.

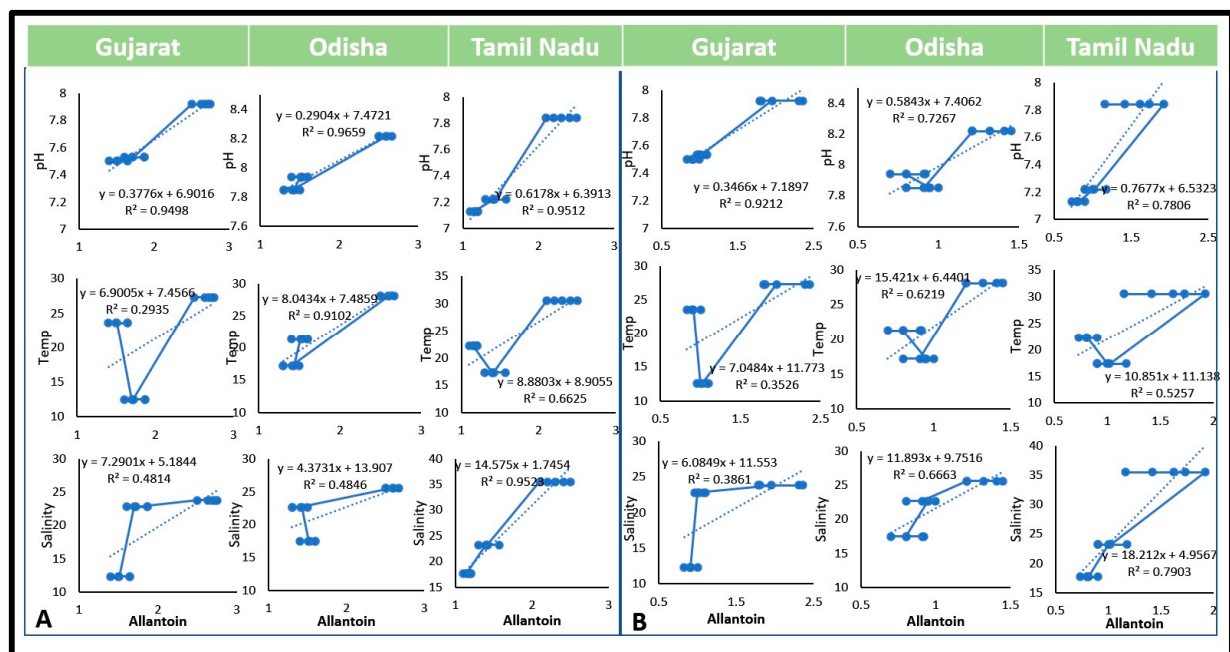

Correlations were formed by taking allantoin (x axis) and physico-chemical properties of water (y axis) and each graph having slope equation and “ $r^2$ ” values. Seasonal correlation graph of temperature, pH and salinity with allantoin of hepatopancreas (A) and muscle (B) tissue of *S. serrata*.

**Figure S2.** Correlation graph of sediment factors and allantoin.

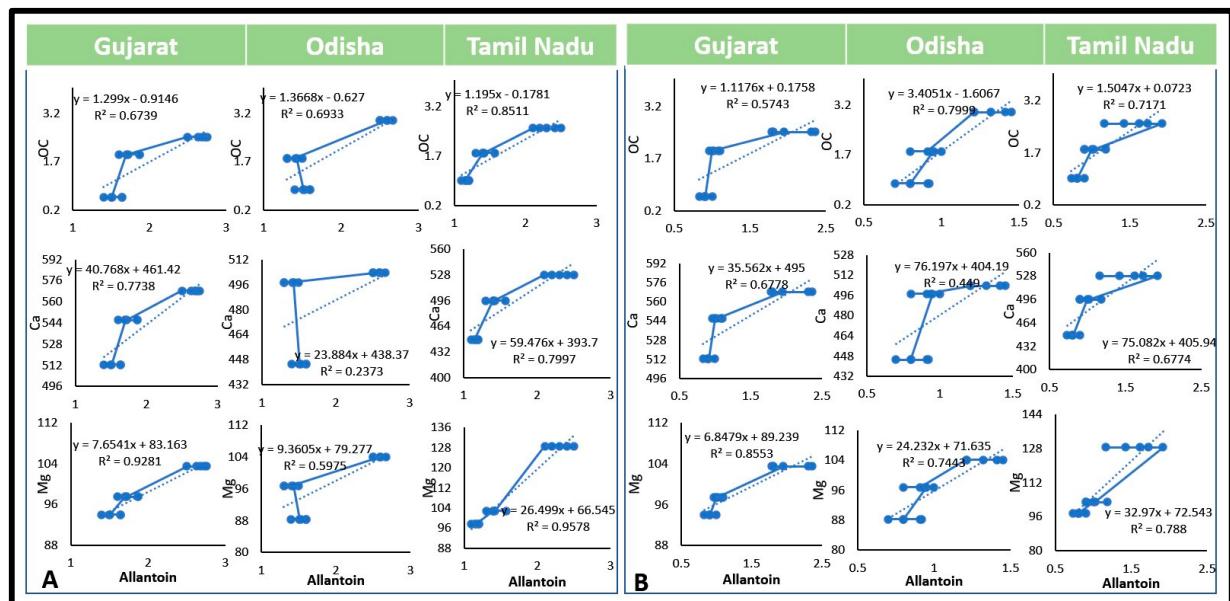

Correlations were formed by taking allantoin (x axis) and sedimental factors (y axis) and each graph having slope equation and " $r^2$ " values. Seasonal correlation graph of OC, Ca and Mg with allantoin of hepatopancreas (A) and muscle (B) tissue of *S. serrata*.

**Figure S3.** Correlation graph of OS and AD enzymes with allantoin.

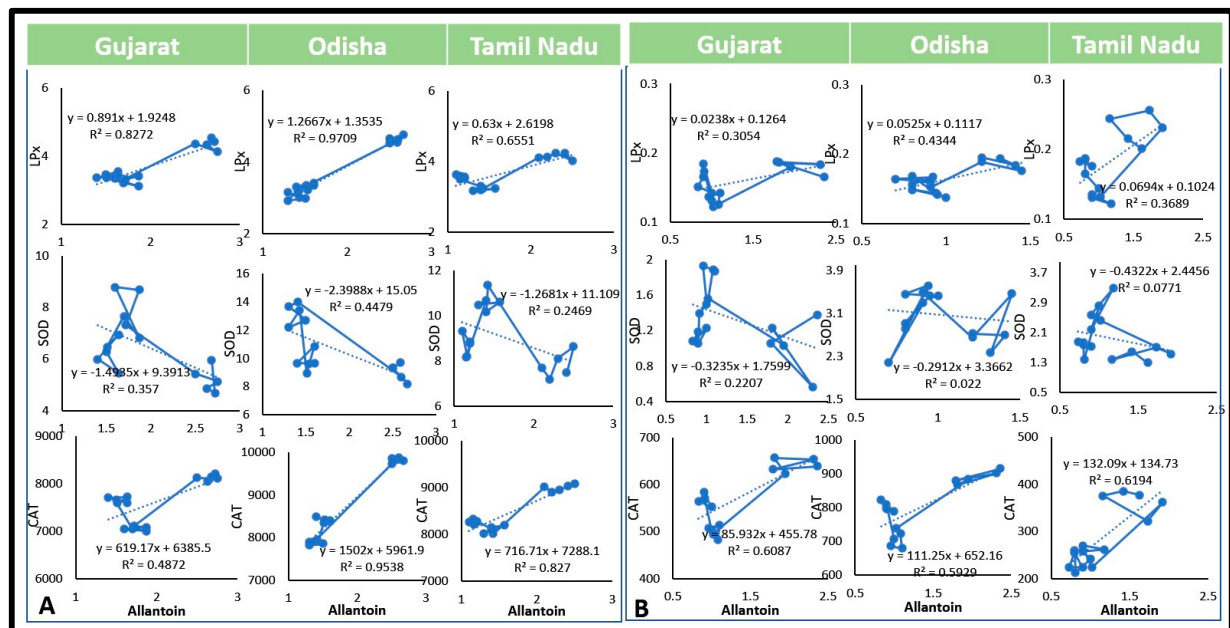

Correlations were formed by taking allantoin (x axis) and AD enzymes (y axis) and the graph includes slope equation and “ $r^2$ ” values. Seasonal correlation graph of LPx, CAT and SOD with allantoin of hepatopancreas (A) and muscle (B) tissue of *S. serrata*.

**Figure S4.** Correlation graph of AD enzymes with allantoin.

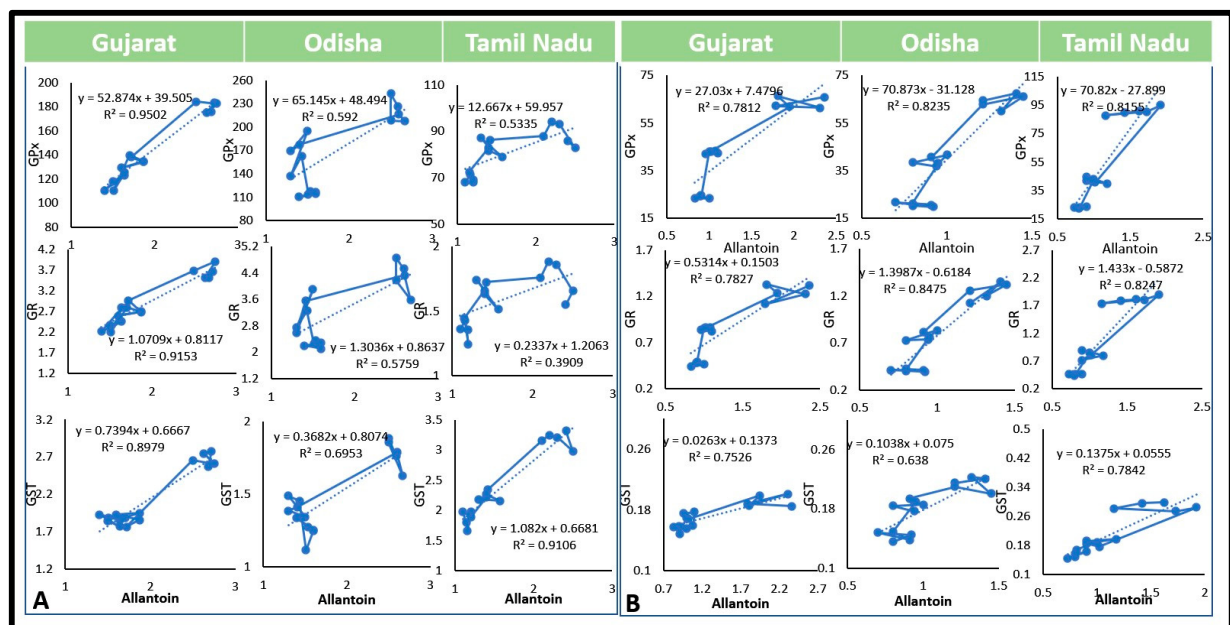

Correlations were formed by taking allantoin (x axis) and AD enzymes (y axis) and the graph includes slope equation and “ $r^2$ ” values. Seasonal correlation graph of GPx, GR and GST with allantoin of hepatopancreas (A) and muscle (B) tissue of *S. serrata*.

**Figure S5.** Correlation graph of small AD molecules and total antioxidant capacity with allantoin.

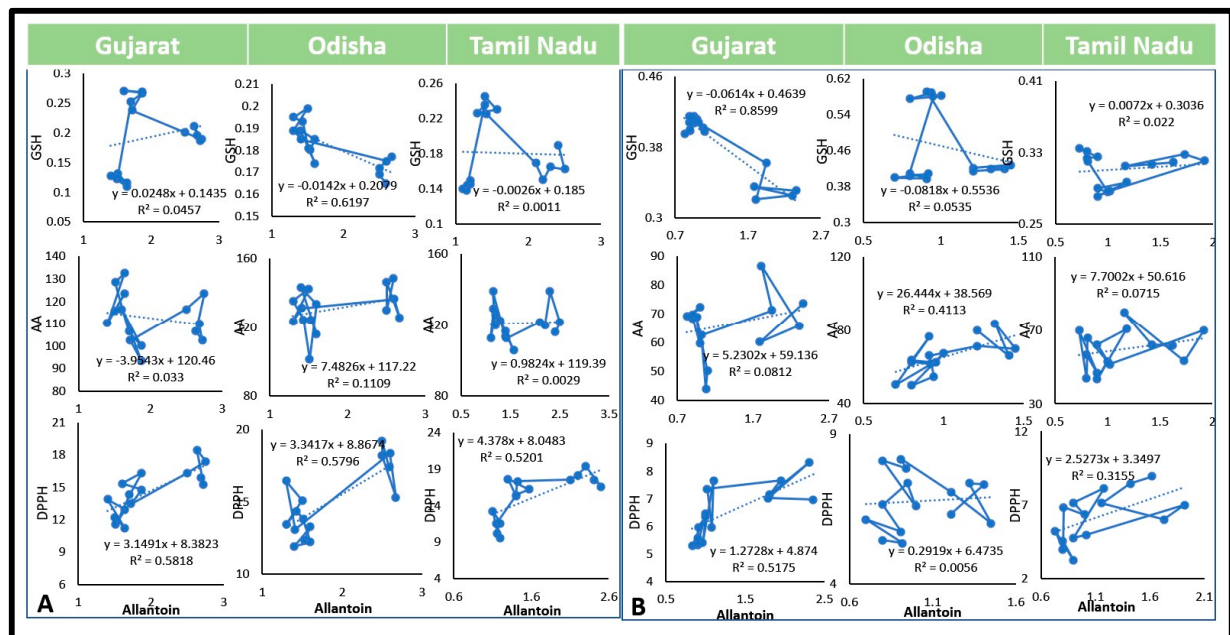

Correlations were formed by taking allantoin (x axis) and small AD enzymes (y axis) showing slope equation and " $r^2$ " values. Seasonal correlation graph of GSH, AA and DPPH with allantoin of hepatopancreas (A) and muscle (B) tissue of *S. serrata*.
